# Supplementary material for: Copper current collectors reduce long-term fouling of air cathodes in microbial fuel cells
Source: Royal Society of Chemistry journal article supplement (doi:10.1039/c7ew00518k), 2018-01-01
Supplement: c7ew00518k1.pdf [file c7ew00518k1.pdf]

## Supplementary data

### **Copper current collectors reduce long-term fouling of air cathodes in microbial fuel cells**

*Jaewook Myung<sup>1,3</sup>, Wulin Yang<sup>1</sup>, Pascal E. Saikaly<sup>2</sup>, Bruce E. Logan<sup>1,\*</sup>*

<sup>1</sup>Department of Civil and Environmental Engineering, The Pennsylvania State University, University Park, PA 16802, USA

<sup>2</sup>Biological and Environmental Sciences and Engineering Division, Water Desalination and Reuse Research Center, King Abdullah University of Science and Technology, Thuwal, 23955-6900, Saudi Arabia

<sup>3</sup>Current address: Department of Civil and Environmental Engineering, Southern Methodist University, Dallas, TX 75205, USA

\* Corresponding author: E-mail: [blogan@psu.edu](mailto:blogan@psu.edu); phone: +1-814-863-7908; fax: +1-814-863-7304

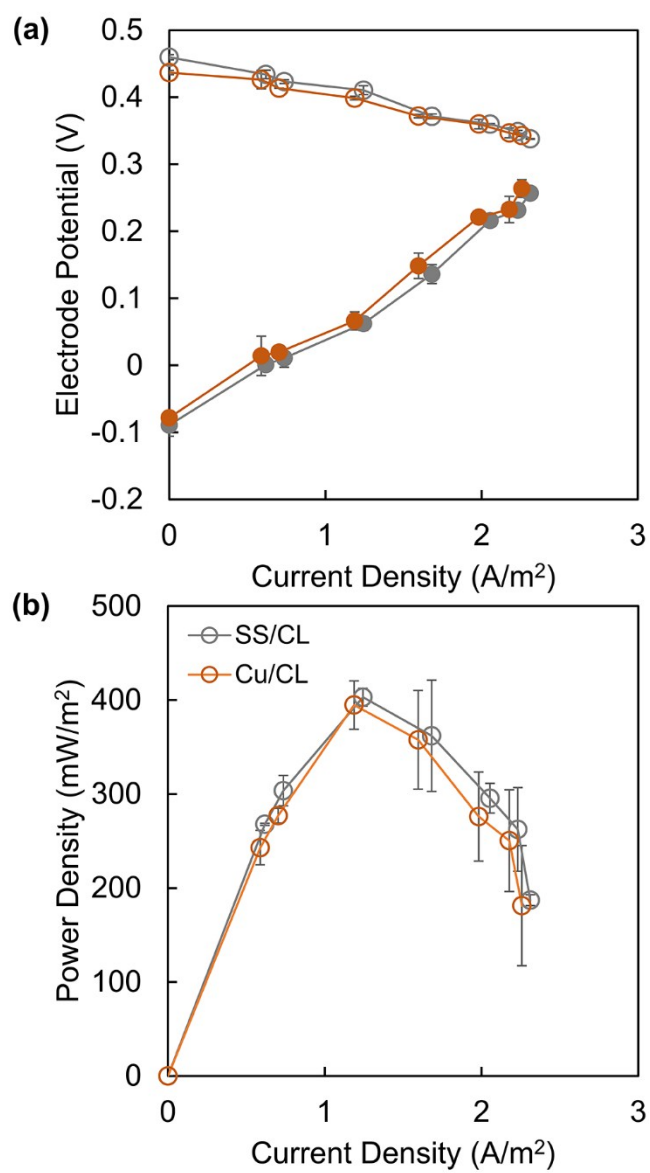

**Fig. S1.** (a) Electrode potentials for SS and Cu reactors at week 13 (solid symbols, anode potentials; open symbols, cathode potentials). (b) Power density curves for SS and Cu reactors at week 13.

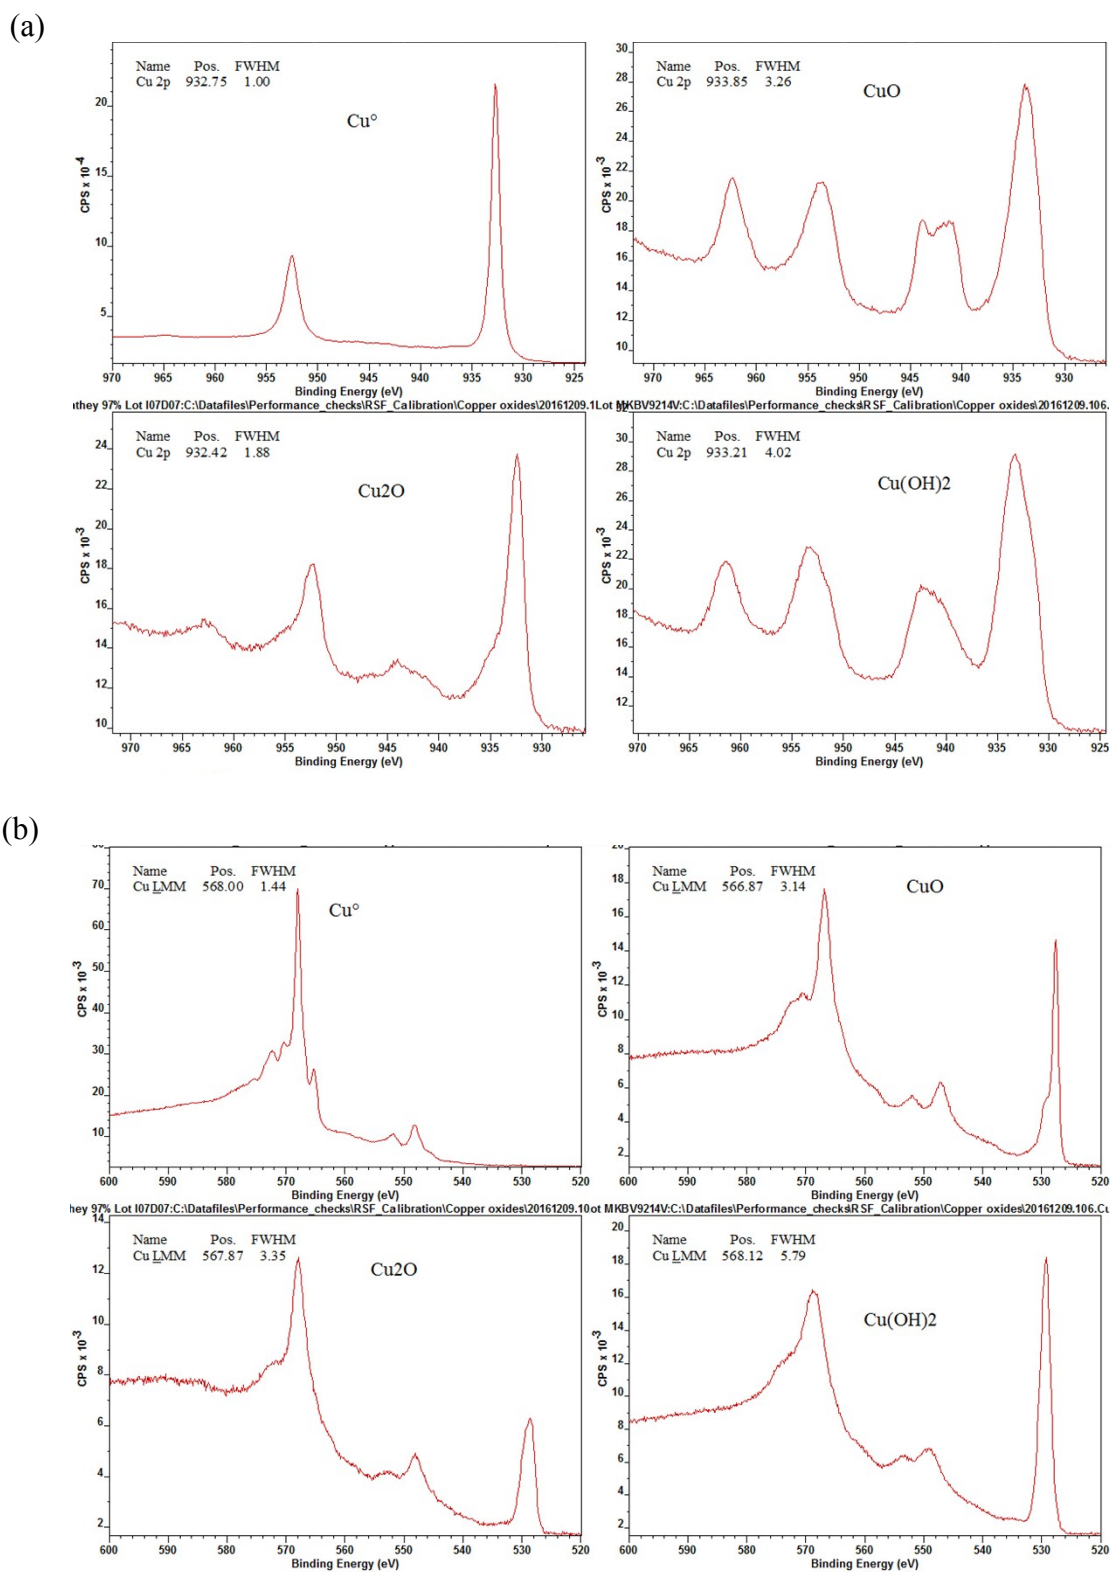

Fig. S2. XPS spectra ((a) Cu<sub>2</sub>p<sub>3/2</sub> peak and (b) Cu LMM peak) of the samples analyzed.

### *Antimicrobial activities of different copper species*

Due to the changes in the copper species of the cathode over time, the toxicity of copper with different oxidation states was evaluated based on viable plate counts of mixed culture microorganisms in the wastewater samples. The total viable counts decreased over time for all copper species, but at a different rate depending on the copper species added to wastewater samples (Fig. S3). Wastewater samples that had  $\text{Cu}^0$  or  $\text{Cu}_2\text{O}$  powder showed lower viable numbers than the samples that had  $\text{CuO}$  powder. Control samples that had no copper species had negligible changes in viable counts.

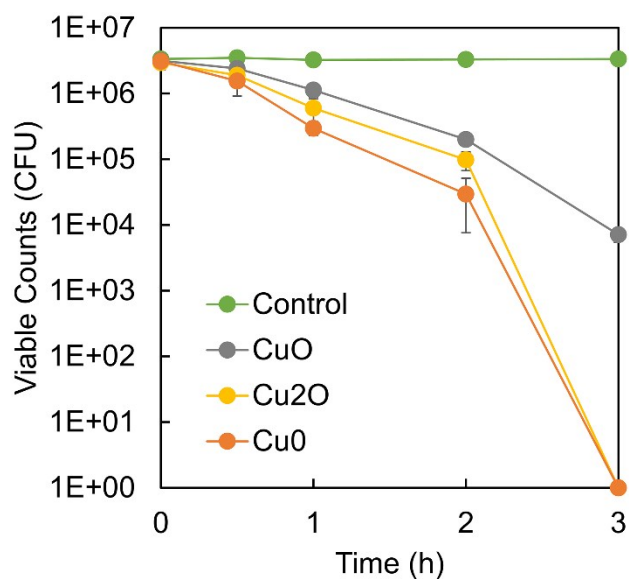

Fig. S3. Antimicrobial activities of various copper species suspended on a wastewater sample
